# Supplementary material for: Thermal Inactivation of African Swine Fever Virus in Swill
Source: Frontiers journal article supplement (doi:10.3389/fvets.2022.906064), 2022-06-06
Supplement: Table_1.XLSX [file Table_1.XLSX]

## Sheet: About
	Predicting D value and cooking time for swill
	Version 1.01 : Copyright 2022 Suphachai Nuanualsuwan
	This spreadsheet was initially generated as the data availability to the publication article;
	Thermal inactivation of African swine fever virus in swill
	Frontiers in Veterinary Science
	Version 1.01
	Suphachai Nuanualsuwan
	Center of Excellence for Food and Water Risk Analysis (FAWRA)
	Department of Veterinary Public Health, Faculty of Veterinary Science,
	Chulalongkorn University, Bangkok, Thailand.
	email: suphachai.n@chula.ac.th
	Acknowledgment
	This spreadsheet was inspired by the comment from reviewers of Frontiers in Veterinary Science
	Disclaimer
	The author has taken every care to ensure that the output from this spreadsheet is accurate.
	The objetive of this spreadsheet is to predict the D values and then the cooking time of 3 swill formulae.
	Neither the author nor Journal accept any liability for any consequences, direct or indirect resulting from a decision by the user to take, or not to take, any action based on outputs from this spreadsheet.

## Sheet: Proximate analysis
	This spreadsheet was designated to predict the mean D value and cooking time of 3 swill formulae.
	Swill composition	Percent (w/w)a
		Swill formula 1	Swill formula 2	Swill formula 3
	Crude fiber	5.42 ± 1.23	0.59 ± 0.21	0.50 ± 0.11
	Crude Fat	0.98 ± 0.14	2.99 ± 0.42	4.43 ± 0.69
	Moisture	0.98 ± 0.14	72.82 ± 2.42	70.44 ± 0.21
	Total Carbohydrate	15.21 ± 2.49	25.38 ± 2.21	21.71 ± 0.12
	Ash	0.57 ± 0.04	1.82 ± 0.42	0.76 ± 0.05
	Crude Protein	3.22 ± 0.37	7.96 ± 0.25	2.74 ± 0.13

## Sheet: Swill Formula 1
	Thermal inactivation of African swine fever virus in swill
	Swill formula 1: 5.42% Crude fiber, 0.98% Crude Fat, 15.21% Total Carbohydrate, 3.22% Crude Protein
	Celcius (oC)	Farenheit (oF)	Predicted D value			Desired	Predicted Cooking time (min)			Add
			Lower 95% CI	Mean	Upper 95% CI	Log reduction	Lower 95% CI	Mean	Upper 95% CI	Safety margin
	60	140	11.9002	27.6148	63.8013	4	47.6009	110.459	255.205	382.808			Instructions
	70	158	2.1618	5.77208	15.3333	4	8.64719	23.0883	61.3331	91.9996			1. Enter cooking temperature (celcius) of swill in cell B14
	80	176	0.392712	1.20649	3.68502	4	1.57085	4.82595	14.7401	22.1101			2. Enter desired log reduction in cell G14
	90	194	0.07134	0.252181	0.885614	4	0.28536	1.00873	3.54246	5.31369
	100	212	0.0129596	0.0527113	0.212838	4	0.0518385	0.210845	0.851353	1.27703
	Version 1.01 : Copyright 2022 Suphachai Nuanualsuwan
	CI: Confidence interval
	Adding safety of margin by 50%

## Sheet: Swill Formula 2
	Thermal inactivation of African swine fever virus in swill
	Swill formula 2: 0.59% Crude fiber, 2.99% Crude Fat, 25.38% Total Carbohydrate, 7.96% Crude Protein
	Celcius (oC)	Farenheit (oF)	Predicted D value			Desired	Predicted Cooking time (min)			Add
			Lower 95% CI	Mean	Upper 95% CI	Log reduction	Lower 95% CI	Mean	Upper 95% CI	Safety margin
	60	140	3.12832	28.4099	258.185	5	15.6416	142.049	1290.93	1936.39			Instructions
	70	158	0.498727	6.54206	85.8855	5	2.49363	32.7103	429.427	644.141			1. Enter cooking temperature (celcius) of swill in cell B14
	80	176	0.0795087	1.50647	28.5699	5	0.397544	7.53233	142.849	214.274			2. Enter desired log reduction in cell G14
	90	194	0.0126755	0.3469	9.50379	5	0.0633777	1.7345	47.5189	71.2784
	100	212	0.00202078	0.079882	3.16144	5	0.0101039	0.39941	15.8072	23.7108
	Version 1.01 : Copyright 2022 Suphachai Nuanualsuwan
	CI: Confidence interval
	Adding safety of margin by 50%

## Sheet: Swill Formula 3
	Thermal inactivation of African swine fever virus in swill
	Swill formula 3: 0.5% Crude fiber, 4.43% Crude Fat, 21.71% Total Carbohydrate, 2.74% Crude Protein
	Celcius (oC)	Farenheit (oF)	Predicted D value			Desired	Predicted Cooking time (min)			Add
			Lower 95% CI	Mean	Upper 95% CI	Log reduction	Lower 95% CI	Mean	Upper 95% CI	Safety margin
	60	140	7.18082	37.8395	201.154	4	28.7233	151.358	804.617	1206.93			Instructions
	70	158	1.00509	6.98667	49.0664	4	4.02034	27.9467	196.266	294.398			1. Enter cooking temperature (celcius) of swill in cell B14
	80	176	0.14068	1.29001	11.9685	4	0.56272	5.16005	47.8739	71.8109			2. Enter desired log reduction in cell G14
	90	194	0.0196907	0.238187	2.9194	4	0.0787628	0.952749	11.6776	17.5164
	100	212	0.00275607	0.0439787	0.712113	4	0.0110243	0.175915	2.84845	4.27268
	Version 1.01 : Copyright 2022 Suphachai Nuanualsuwan
	CI: Confidence interval
	Adding safety of margin by 50%

## Sheet: Password to unlock
Password to unlock protection sheet	1234
